## Claiming Your Issue Quiz Credit

Subscribers to *Focus* can claim CME credit for completed issue quizzes exclusively through the American Psychiatric Association's online education portal, The APA Learning Center.

The APA Learning Center is the integrated home for all of your professional education needs, with activities to earn CME credit, meet MOC requirements, and learn new skills. In addition to *Focus* issue quizzes and the annual self-assessment, there are more than 200 activities in the Learning Center Catalog, many offered for free or at a minimal cost (APA Members always get the best price).

Completed activities are automatically reflected on your APA Transcript. You can even record activities from other CME providers on your transcript using our External Certificate feature.

To claim credit for this *Focus* issue quiz, please do the following:

- Go to <http://apapsy.ch/Focus-Spring-2016>
- Log in to your existing APA account (for assistance with online access call 800-368-5777 or e-mail [appi@psych.org](mailto:appi@psych.org))
- Click "Access Activity"
- Select your certificate type and confirm your choice via the pop-up window (Note: You may need to disable pop-up blockers)
- Review the Activity Overview and CE Information sections
- Complete the View Content, Quiz, and Evaluation sections
- Select the number of credit(s) on the Certificate section and review your certificate

Paper-based CME credit applications through the mail are no longer accepted.

## Call for Papers

*Focus: The Journal of Lifelong Learning in Psychiatry* is accepting papers for these upcoming theme issues.

**Winter 2017:** Neurocognitive Disorders and Geriatric Psychiatry

Deadline for submission: September 1, 2016

**Spring 2017:** Anxiety Disorders

Deadline for submission: December 1, 2016

**Summer 2017:** Integrated Care

Deadline for submission: March 1, 2017

*Focus* is seeking comprehensive, scholarly articles that bring together existing knowledge on a clinical topic important to practicing general psychiatrists. A key, but not exclusive, element would be to include developments from the past 4 years and discuss how they integrate into the existing body of knowledge.

Please go to our online manuscript submission site at <https://mc.manuscriptcentral.com/appi-focus> to upload your paper. Inquiries about the process or other upcoming issues can be sent to [focus@psych.org](mailto:focus@psych.org).

# Understanding Mental Disorders

## Your Guide to DSM-5®

American Psychiatric Association

**A consumer guide for anyone who has been touched by mental illness!**

***Understanding Mental Disorders: Your Guide to DSM-5®*** is a vital resource for anyone who has been touched by mental illness.

Most of us know someone who suffers from a mental illness. This book helps those who may be struggling with mental health problems, as well as those who want to help others achieve mental health and well-being.

Based on the latest, fifth edition of the *Diagnostic and Statistical Manual of Mental Disorders*—known as DSM-5®—***Understanding Mental Disorders*** provides valuable insight on what to expect from an illness and its treatment—and will help readers recognize symptoms, know when to seek help, and get the right care. Featured disorders include depression, schizophrenia, ADHD, autism spectrum disorder, posttraumatic stress disorder, and bipolar disorder, among others.

The common language for diagnosing mental illness used in DSM-5® for mental health professionals has been adapted into clear, concise descriptions of disorders for nonexperts. In addition to specific symptoms for each disorder, readers will find:

- Risk factors and warning signs
- Related disorders
- Ways to cope
- Tips to promote mental health
- Personal stories
- Key points about the disorders and treatment options
- A special chapter dedicated to treatment essentials and ways to get help
- Helpful resources that include a glossary, list of medications and support groups

For more resources and information, go to [www.psychiatry.org/UnderstandingMentalDisorders](http://www.psychiatry.org/UnderstandingMentalDisorders)

**Just  
Published!**

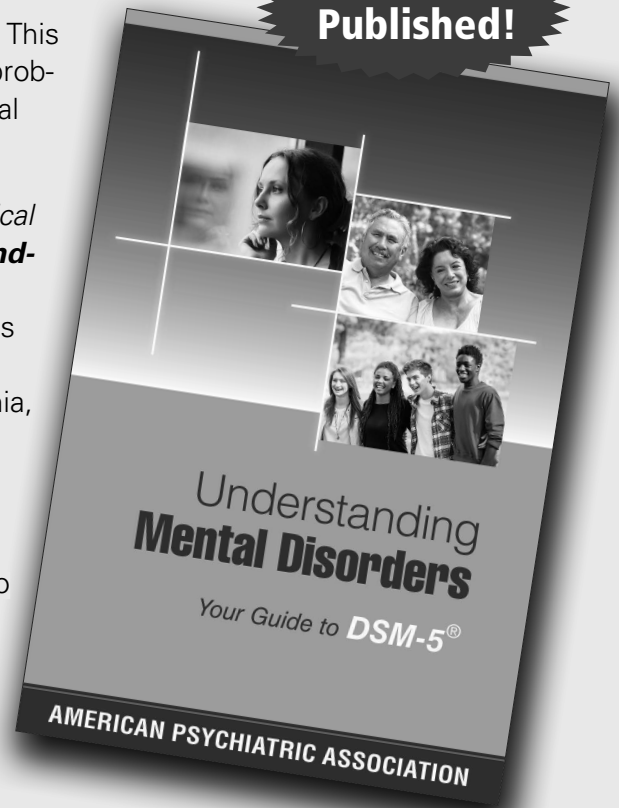

*With Foreword by  
Patrick J. Kennedy*

2015 • 370 pages • ISBN 978-1-58562-491-1 • Paperback • \$24.95 • Item #62491

# The DSM-5 Collection

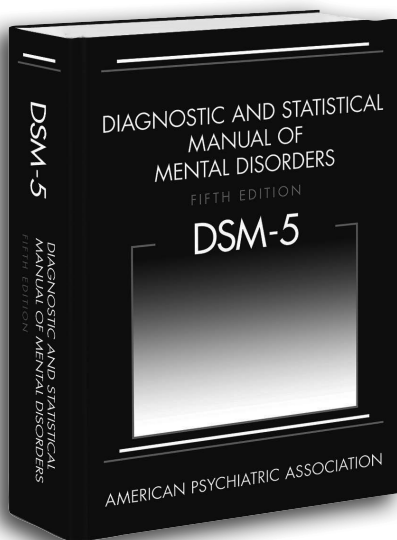

## Diagnostic and Statistical Manual of Mental Disorders, Fifth Edition (DSM-5®)

American Psychiatric Association

This new edition of *Diagnostic and Statistical Manual of Mental Disorders (DSM-5®)*, used by clinicians and researchers to diagnose and classify mental disorders, is the product of more than 10 years of effort by hundreds of international experts in all aspects of mental health. Their dedication and hard work have yielded an authoritative volume that defines and classifies mental disorders in order to improve diagnosis, treatment, and research.

The criteria are concise and explicit, intended to facilitate an objective assessment of symptom presentations in a variety of clinical settings—inpatient, outpatient, partial hospital, consultation-liaison, clinical, private practice, and primary care.

- The latest findings in neuroimaging and genetics have been integrated into each disorder along with gender and cultural considerations.
- The revised organizational structure recognizes symptoms that span multiple diagnostic categories, providing new clinical insights in diagnosis.

Includes ICD-10-CM codes

- Both ICD-9-CM and ICD-10-CM codes are included for each disorder.

The *Diagnostic and Statistical Manual of Mental Disorders*, Fifth Edition, is the most comprehensive, current, and critical resource for clinical practice available to today's mental health professionals.

2013 • 991 pages • ISBN 978-0-89042-554-1 • Hardcover • \$205.00 • Item #2554

2013 • 991 pages • ISBN 978-0-89042-555-8 • Paperback • \$155.00 • Item #2555

2013 • 991 pages • ISBN 978-0-89042-557-2 • eBook • \$124.00 • Item #2557

**DSM-5**  
COLLECTION

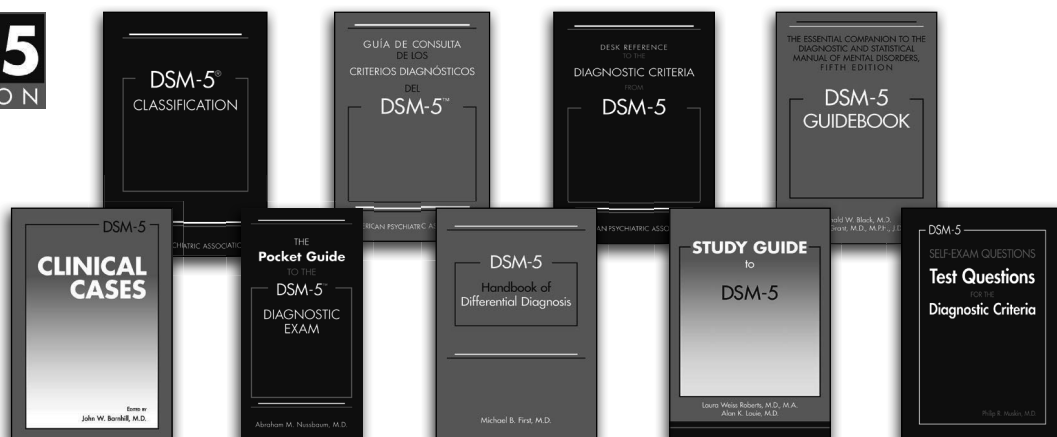

AMERICAN  
PSYCHIATRIC  
ASSOCIATION  
PUBLISHING

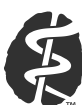

Order Online: [www.appi.org](http://www.appi.org)  
Phone: 703-907-7322  
Toll Free: 1-800-368-5777  
Email: [appi@psych.org](mailto:appi@psych.org)

20% Discount for American Psychiatric  
Association Members

25% Discount for APA Resident-Fellow Members AH1552A
