SPRING 2016 | VOLUME 14 | NUMBER 2

# Focus

The Journal of Lifelong Learning in Psychiatry

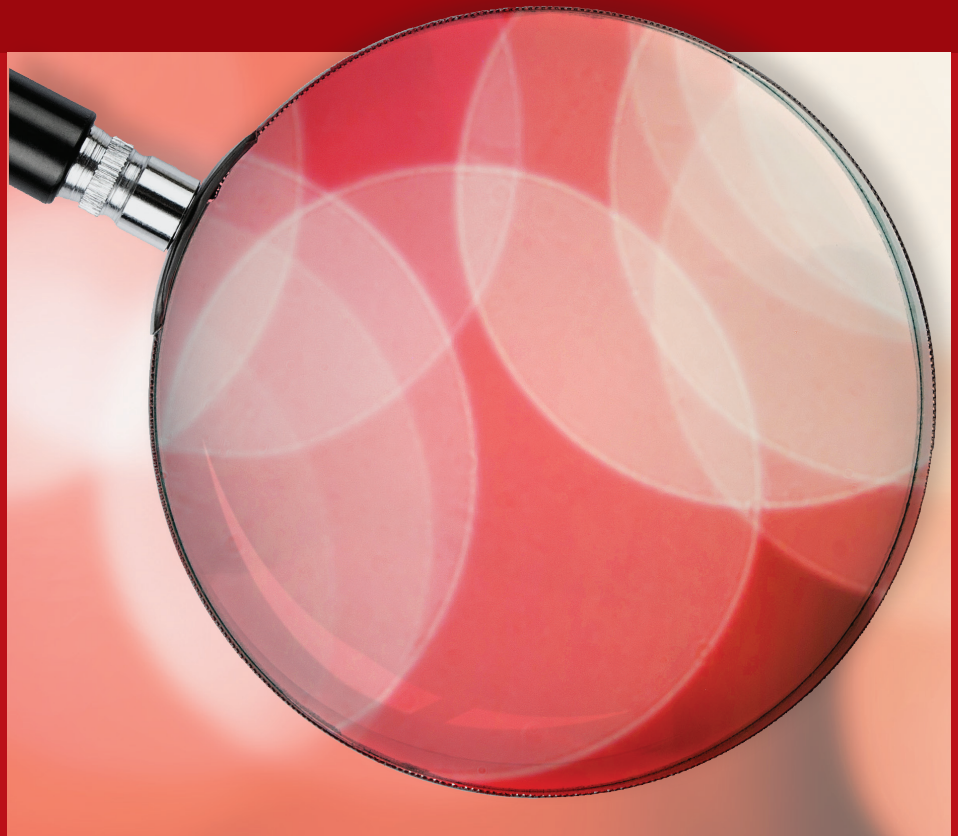

## Depression: Challenges and Treatments

Guest Editors: George Hadjipavlou, M.D., M.A., F.R.C.P.C.,  
and Raymond W. Lam, M.D., F.R.C.P.C.

AMERICAN  
PSYCHIATRIC  
ASSOCIATION 

[focus.psychiatryonline.org](http://focus.psychiatryonline.org)
